# Supplementary material for: Multi-scene visual hydrazine hydrate detection based on a dibenzothiazole derivative
Source: Royal Society of Chemistry journal article supplement (doi:10.1039/d2an02045a), 2023-01-01
Supplement: d2an02045a1.pdf [file d2an02045a1.pdf]

## Multi-scene visual hydrazine hydrate detection based on dibenzothiazole derivative

Yingshuang Chen, Chuanfeng Zhao, Xinyi Liu, Qian Zhang, Yuliang Jiang\*, Jian Shen\*  
Jiangsu Collaborat Innovat Ctr Biomed Funct Mat, Jiangsu Key Lab Biofunct Mat, Sch  
Chem & Mat Sci, Nanjing Normal University, Nanjing 210023, Jiangsu, PR China

### List of contents

1. Experimental section
2.  $^1\text{H}$  NMR spectroscopy of compound 1
3.  $^1\text{H}$  NMR spectroscopy of compound 2
4.  $^{13}\text{C}$  NMR spectroscopy of compound 2
5.  $^1\text{H}$  NMR spectroscopy of probe DBTD
6.  $^{13}\text{C}$  NMR spectroscopy of probe DBTD
7. MS spectroscopy of probe DBTD
8. Comparison of analytical performance of early  $\text{N}_2\text{H}_4$  probes
9. The fluorescence quantum yield of probe DBTD in the absence or presence of  $\text{N}_2\text{H}_4$
10. Fluorescence response of probe DBTD to different analytes
11.  $^1\text{H}$  NMR titration in DMSO- $d_6$  solution
12. FT-IR of the probe DBTD and the adduct DBTD- $\text{N}_2\text{H}_4$
13. MS spectroscopy of the DBTD- $\text{N}_2\text{H}_4$
14. The linear relationship of the fluorescence intensity of probe DBTD with the concentration of  $\text{N}_2\text{H}_4$  in two kinds of water samples
15. The cells cytotoxicity of probe DBTD
16. Intracellular co-localization fluorescence imaging of the DBTD- $\text{N}_2\text{H}_4$

## 1. Experimental section

### 1.1 Materials and apparatus

All chemicals, including reactants, catalysts and solvents were purchased from commercial suppliers and used without further purification unless otherwise stated. The  $^1\text{H}$  NMR and  $^{13}\text{C}$  NMR spectra were obtained on an AVANCE III HD AN-400 MHz spectrometer (Bruker, Germany). Mass spectroscopy (MS) was recorded on a LCMS-2020 spectrometer (Shimadzu, Japan). Infrared data was obtained from ALPHA II (Bruker, Germany). Ultraviolet-Visible (UV-vis) absorption studies were acquired with a Lambda 650s spectrophotometer (PerkinElmer, USA) and the fluorescence spectrum of probe were carried out on an F-7100 fluorescence spectrophotometer (Hitachi, Japan). Fluorescence imaging experiments of cells and zebrafish were conducted using an A1 confocal laser scanning microscope (Nikon, Japan).

### 1.2 Synthesis of compound 1

2-aminophenanthiol (2 mmol, 0.25 g), 4-bromo-2-hydroxybenzaldehyde (2 mmol, 0.40 g), absolute ethanol (15 mL),  $\text{H}_2\text{O}_2$  (30%, 12.0 mmol, 1.20 mL) and HCl (37%, 8.5 mmol, 0.70 mL) were added into a 100 mL three-neck flask in turn, and the white solid appeared after stirring for about 2 min at room temperature. The reaction process was monitored by TLC until the end, the product was filtered and washed with absolute ethanol, then dried in vacuum to obtain white flocculent solid 0.50 g (81.7% yield). The chemical structures of compound 1 were characterized by  $^1\text{H}$  NMR (Fig. S1).  $^1\text{H}$  NMR (400 MHz,  $\text{DMSO-d}_6$ )  $\delta$  11.71 (s, 1H), 8.39 (d,  $J = 2.5$  Hz, 1H), 8.21 - 7.93 (m, 2H), 7.67 - 7.35 (m, 3H), 7.06 (d,  $J = 8.8$  Hz, 1H).

### 1.3 Synthesis of Compound 2

Compound 1 (2 mmol, 0.61 g) and 4-formylphenylboric acid (3 mmol, 0.51 g),  $\text{Pd}(\text{PPh}_3)_4$  (0.25 mmol, 0.06 g) were added into a 100 mL three neck flask, then added toluene (20 mL) and  $\text{K}_2\text{CO}_3$  (6 mmol, 0.833 g, dissolved in 3 mL of water), the mixture was heated to  $120^\circ\text{C}$  for 24 h under nitrogen protection, the reaction process was monitored by TLC until the end. Cooled to room temperature, then remove the solvent under reduced pressure. The crude product was separated by column chromatography (ethyl acetate: petroleum ether = 1:15) and vacuum dried to obtain

yellow solid 0.41g (61.9% yield). The chemical structures of compound 2 were characterized by  $^1\text{H}$  NMR and  $^{13}\text{C}$  NMR (Fig.S2-S3).  $^1\text{H}$  NMR (400 MHz, DMSO- $d_6$ )  $\delta$  11.84 (s, 1H), 10.08 (dd,  $J = 10.6, 1.7$  Hz, 1H), 8.61 (t,  $J = 2.1$  Hz, 1H), 8.17 (d,  $J = 7.9$  Hz, 1H), 8.12 (d,  $J = 8.1$  Hz, 1H), 8.08-7.92 (m, 4H), 7.86 (dt,  $J = 8.7, 2.1$  Hz, 1H), 7.57 (t,  $J = 7.6$  Hz, 1H), 7.47 (t,  $J = 7.5$  Hz, 1H), 7.24 (dd,  $J = 8.6, 1.6$  Hz, 1H);  $^{13}\text{C}$  NMR (101 MHz, DMSO- $d_6$ )  $\delta$  193.18, 164.39, 157.16, 151.91, 145.58, 135.34, 135.19, 131.55, 130.81, 130.75, 130.69, 128.42, 127.29, 126.95, 125.58, 122.80, 122.50, 119.81, 118.26.

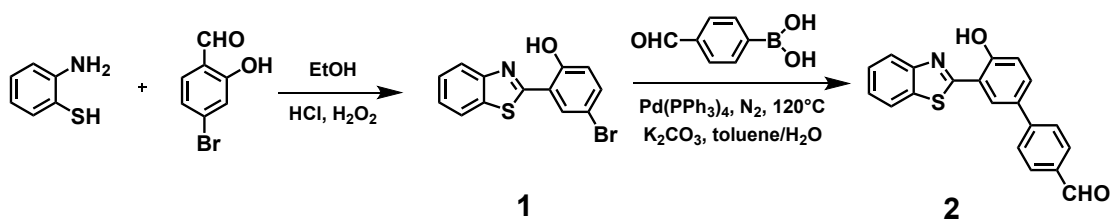

Scheme S1 The synthetic steps of compound 1 and 2.

## 2. $^1\text{H}$ NMR spectroscopy of compound 1

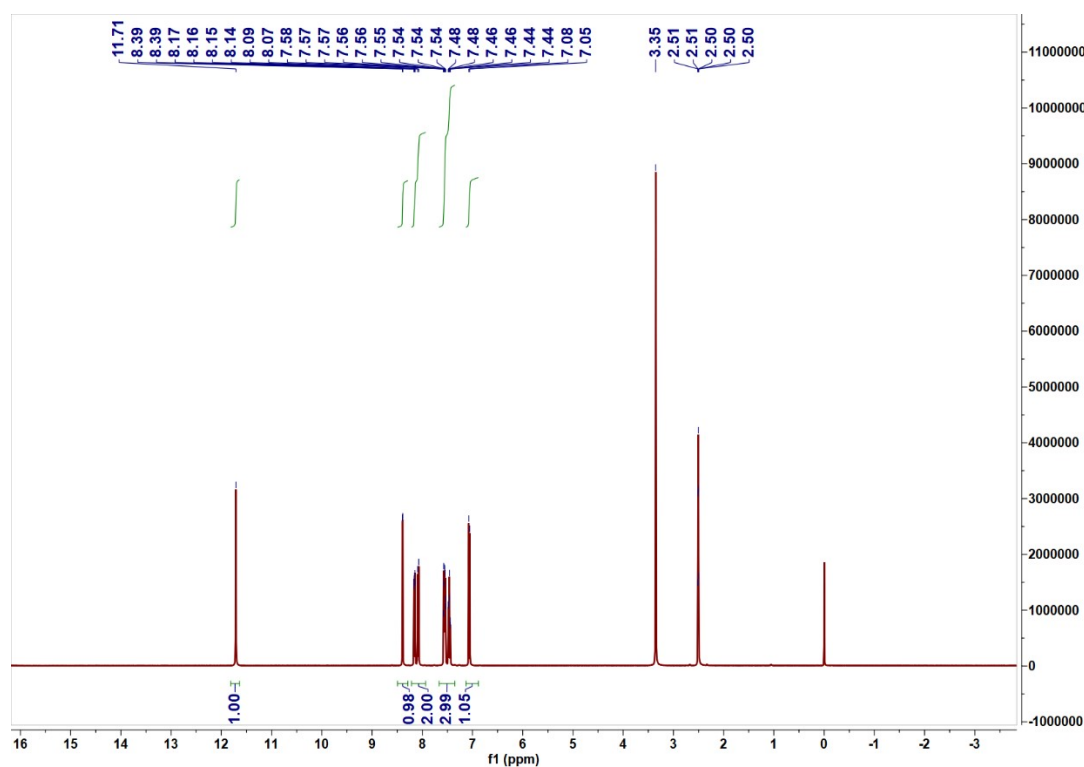

Fig. S1  $^1\text{H}$  NMR spectroscopy of compound 1.

## 3. $^1\text{H}$ NMR spectroscopy of compound 2

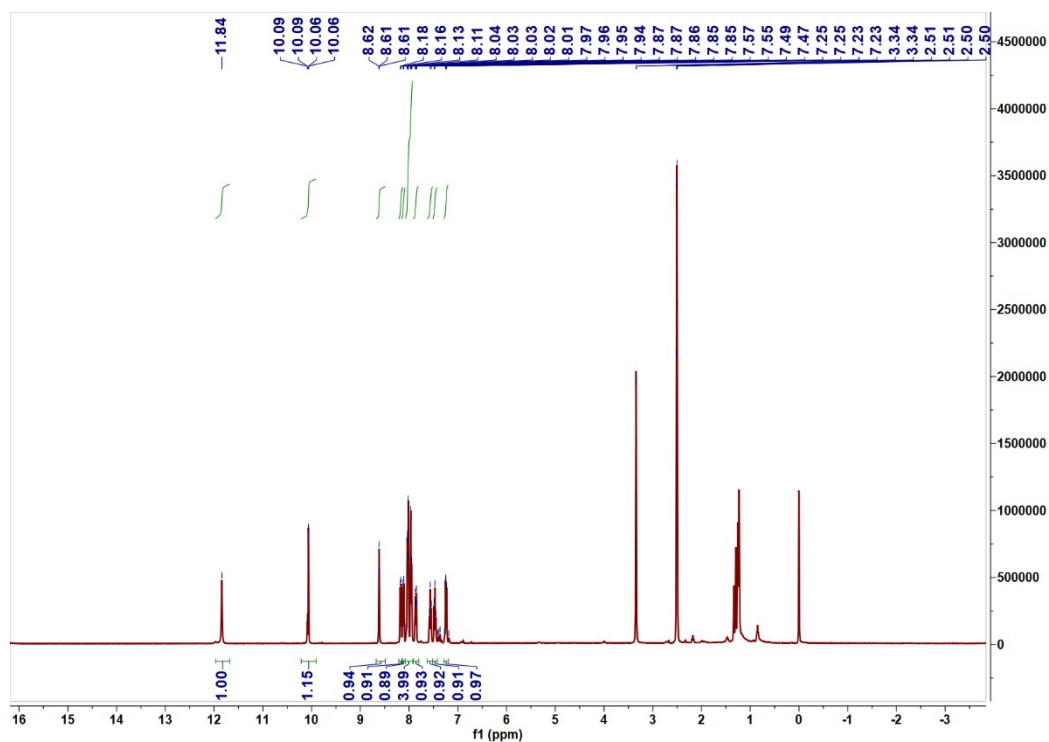

Fig. S2 <sup>1</sup>H NMR spectroscopy of compound 2.

4. <sup>13</sup>C NMR spectroscopy of compound 2

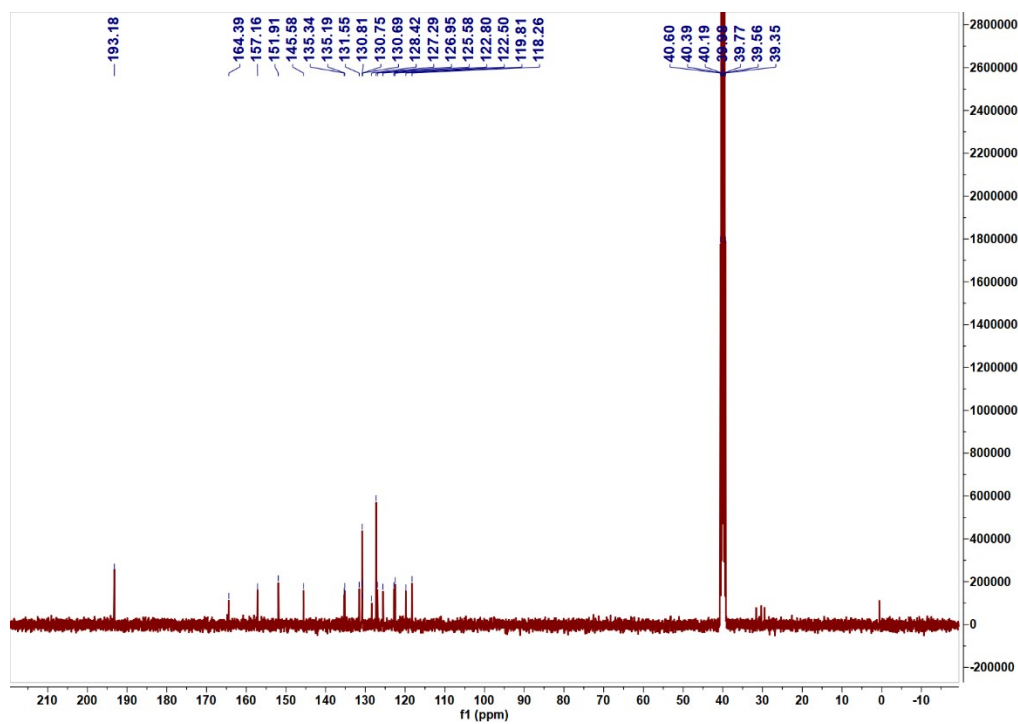

Fig. S3 <sup>13</sup>C NMR spectroscopy of compound 2.

5. <sup>1</sup>H NMR spectroscopy of probe DBTD

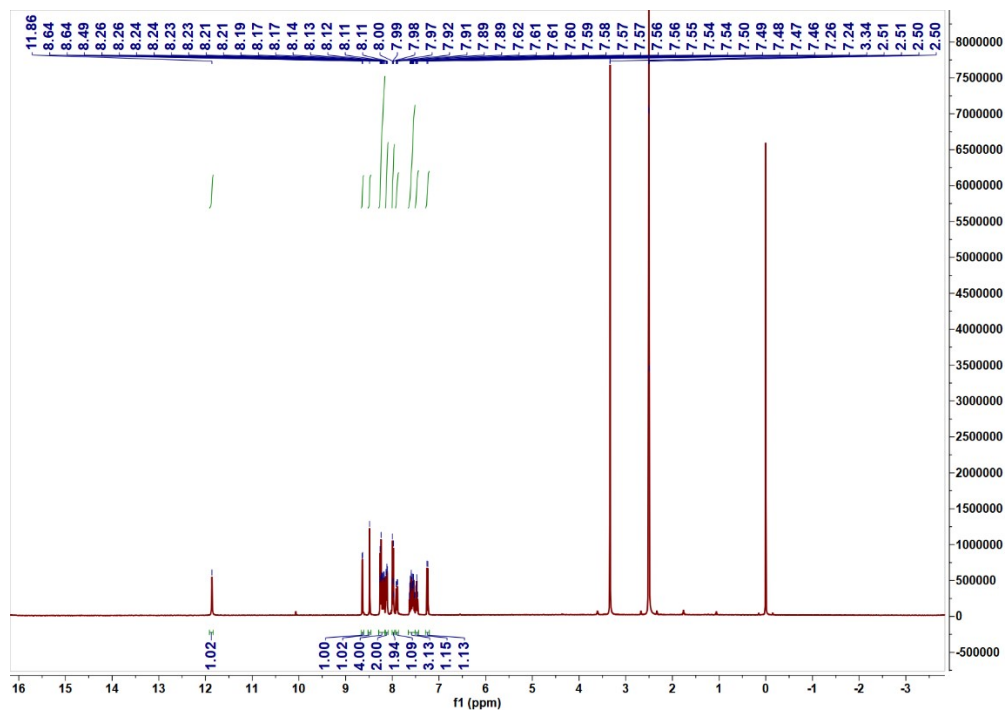

Fig. S4  $^1\text{H}$  NMR spectroscopy of probe DBTD.

### 6. $^{13}\text{C}$ NMR spectroscopy of probe DBTD

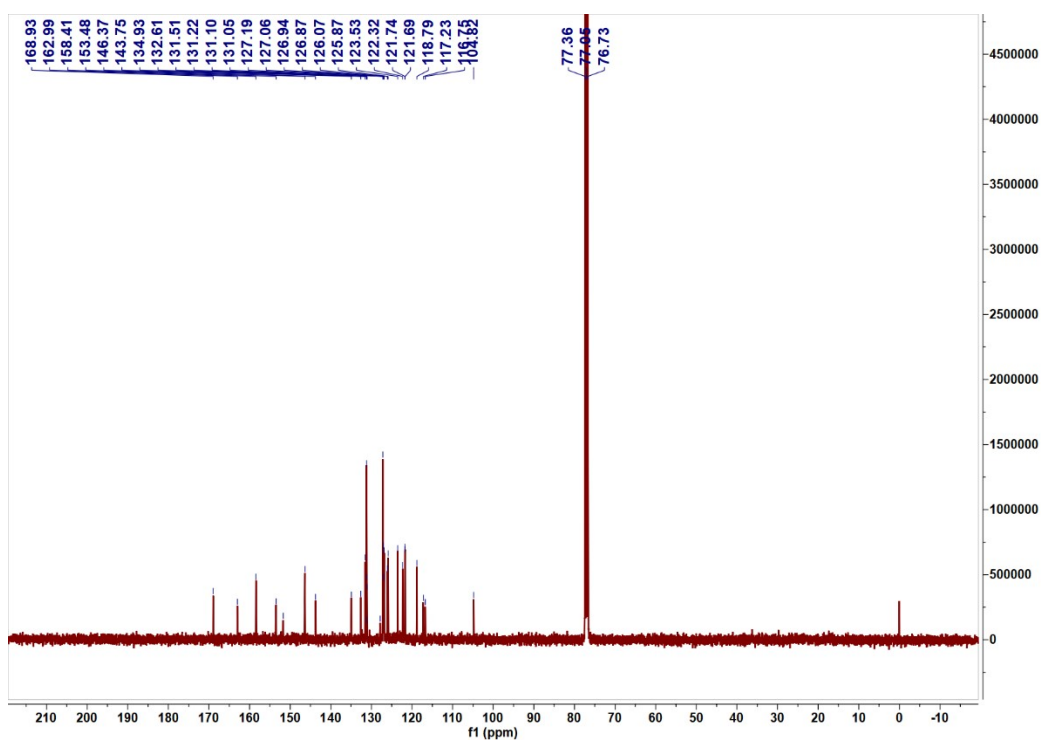

Fig. S5  $^{13}\text{C}$  NMR spectroscopy of probe DBTD.

### 7. MS spectroscopy of probe DBTD

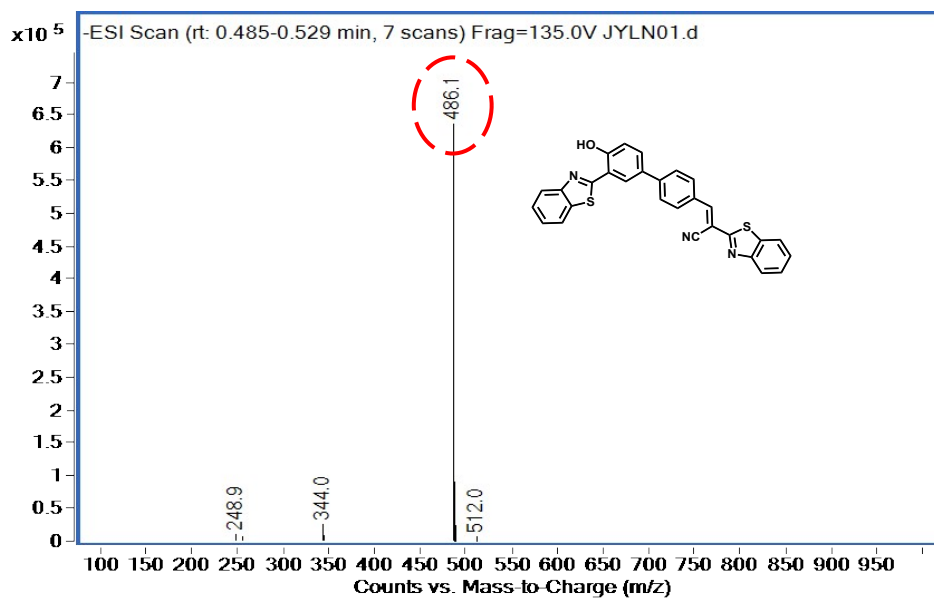

Fig. S6 MS spectroscopy of probe DBTD.

### 8. Table S1 Comparison of analytical performance of early $N_2H_4$ probes

| Probes                                                                              | Response mode | Limit of detection | Response time | Reference |
|-------------------------------------------------------------------------------------|---------------|--------------------|---------------|-----------|
| 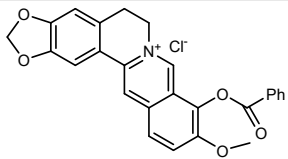 | Turn off      | 1.37 $\mu$ M       | 60 min        | [1]       |
|  | Ratiometric   | 2.6 $\mu$ M        | 120 min       | [2]       |
|  | Ratiometric   | 1.6 $\mu$ M        | 15 min        | [3]       |
|  | Turn on       | ----               | 60 min        | [4]       |
|  | Turn on       | 0.84 $\mu$ M       | 30 min        | [5]       |
|  | Turn on       | 0.49 $\mu$ M       | 60 min        | [6]       |

|                                                                                   |             |                     |        |           |
|-----------------------------------------------------------------------------------|-------------|---------------------|--------|-----------|
| 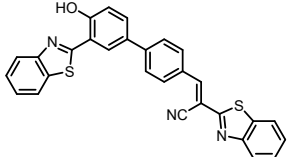 | Ratiometric | 0.438 $\mu\text{M}$ | 45 min | This Work |
|-----------------------------------------------------------------------------------|-------------|---------------------|--------|-----------|

**9. Table S2 the fluorescence quantum yield of probe DBTD in the absence or presence of  $\text{N}_2\text{H}_4$**

| Compound                     | $\lambda_{\text{abs}}/\text{nm}$ | $\lambda_{\text{em}}/\text{nm}$ | $\Phi_{\text{F}}$ |
|------------------------------|----------------------------------|---------------------------------|-------------------|
| DBTD                         | 383/571                          | 650                             | 0.057             |
| DBTD- $\text{N}_2\text{H}_4$ | 431/571                          | 490                             | 0.250             |

**10. Fluorescence response of probe DBTD to different analytes**

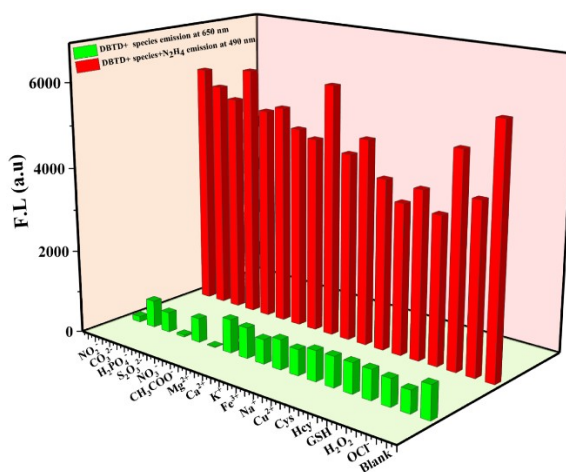

**Fig. S7** (a) Fluorescence responses of probe DBTD (10  $\mu\text{M}$ ) treated with 260  $\mu\text{M}$  other various competitive species ( $\text{NO}_2^-$ ,  $\text{NO}_3^-$ ,  $\text{CH}_3\text{COO}^-$ ,  $\text{CO}_3^{2-}$ ,  $\text{H}_2\text{PO}_4^-$ ,  $\text{S}_2\text{O}_3^{2-}$ ,  $\text{Ag}^+$ ,  $\text{K}^+$ ,  $\text{Cu}^{2+}$ ,  $\text{Ca}^{2+}$ ,  $\text{Fe}^{3+}$ ,  $\text{Na}^+$ ,  $\text{Mg}^{2+}$ ,  $\text{OCl}^-$ , Cys, Hcy, GSH,  $\text{H}_2\text{O}_2$ ) and  $\text{N}_2\text{H}_4$  (130  $\mu\text{M}$ ) at room temperature for 40 min:  $\lambda_{\text{ex}} = 369 \text{ nm}$ . Slit width: 5 nm / 5 nm.

**11.  $^1\text{H}$  NMR titration in  $\text{DMSO-d}_6$  solution**

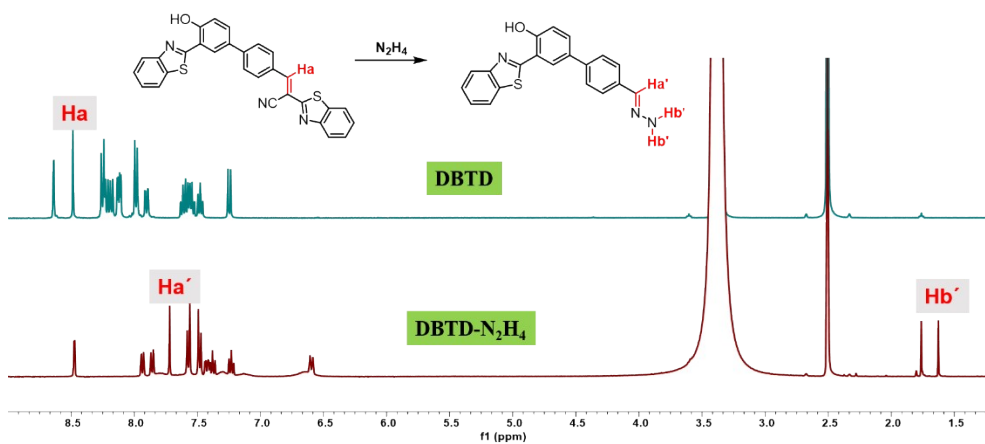

Fig. S8 <sup>1</sup>H NMR titration in DMSO-d<sub>6</sub> solution.

## 12. FT-IR of the probe DBTD and the adduct DBTD-N<sub>2</sub>H<sub>4</sub>

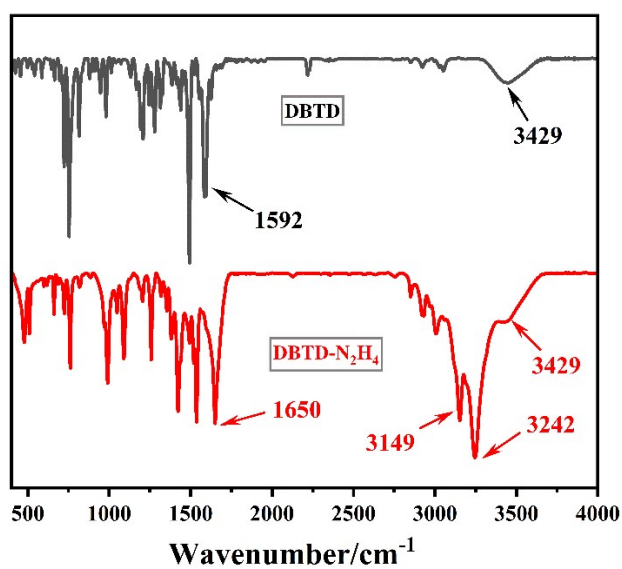

Fig. S9 FT-IR of the probe DBTD and the adduct DBTD-N<sub>2</sub>H<sub>4</sub>.

## 13. MS spectroscopy of the DBTD-N<sub>2</sub>H<sub>4</sub>



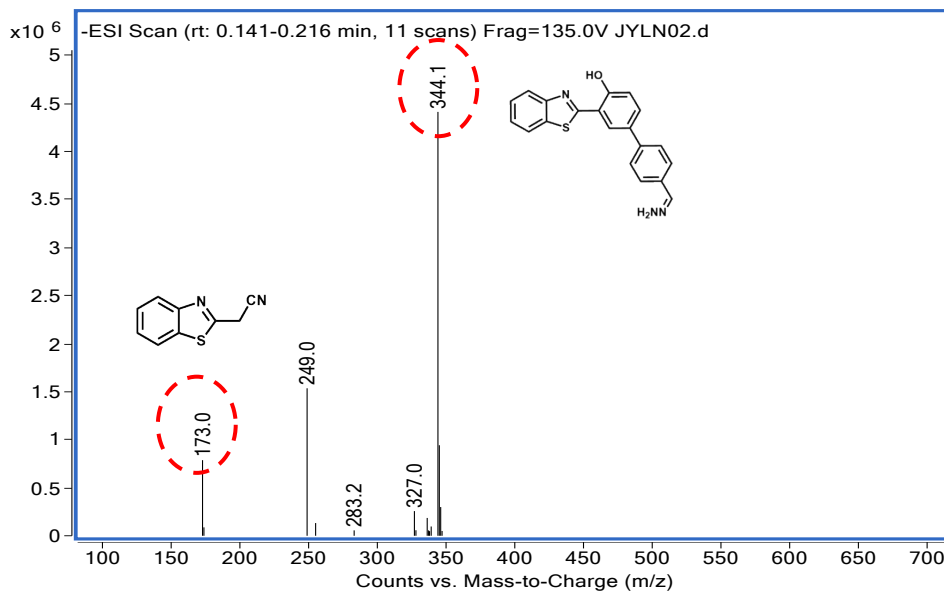

Fig. S10 MS spectroscopy of the DBTD-N<sub>2</sub>H<sub>4</sub>.

**14. The linear relationship of the fluorescence intensity of probe DBTD with the concentration of N<sub>2</sub>H<sub>4</sub> in two kinds of water samples**

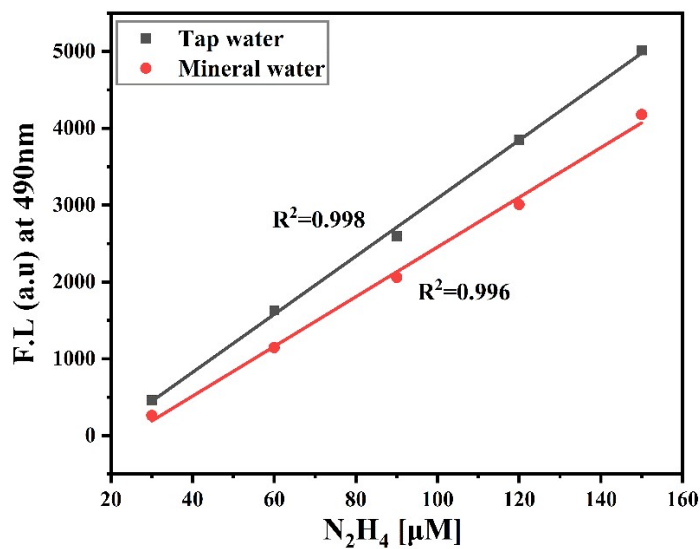

Fig. S11 The linear relationship of the fluorescence intensity of probe DBTD at 490 nm with the concentration of N<sub>2</sub>H<sub>4</sub> (30 μM - 150 μM) in the tap water and mineral water at room temperature. λ<sub>exc</sub> = 369 nm. Slit width: 5 nm / 5 nm.

**15. The cells cytotoxicity of probe DBTD**

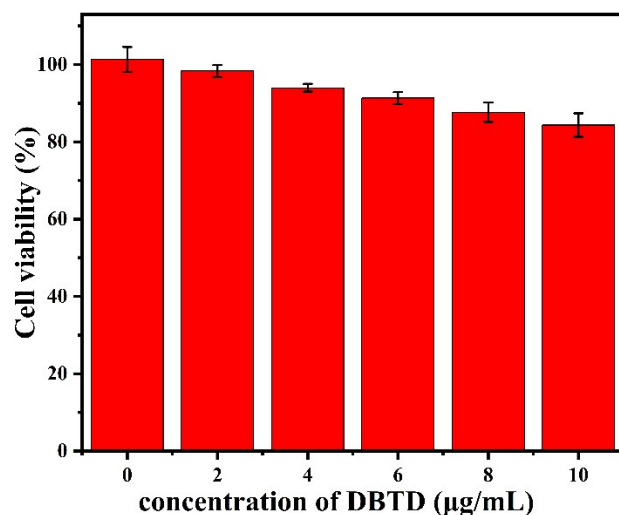

Fig. S12 Cytotoxicity of probe DBTD by a MTT assay (n = 3).

### 16. Intracellular co-localization fluorescence imaging of the DBTD-N<sub>2</sub>H<sub>4</sub>

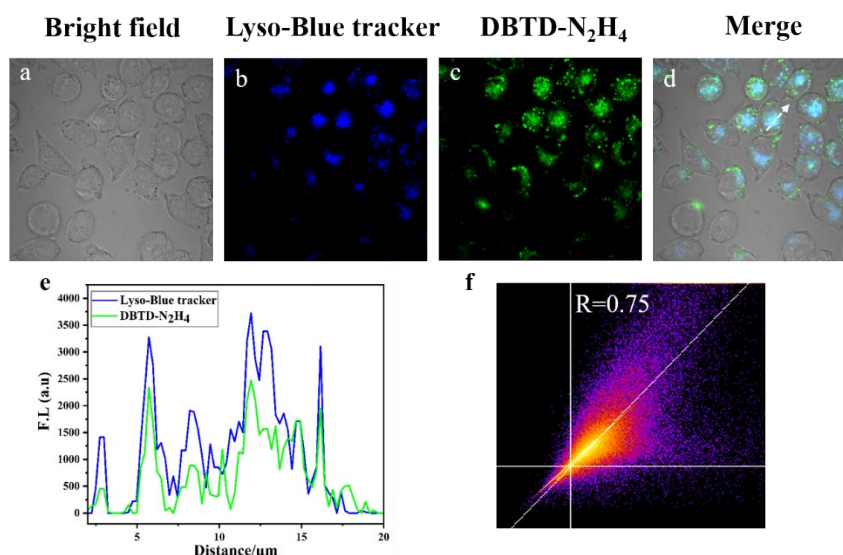

Fig. S13 Intracellular co-localization fluorescence imaging of the DBTD-N<sub>2</sub>H<sub>4</sub> (10 µM). (a) Bright field. (b) Lyso-Blue tracker (100 nM). (c) Confocal fluorescence images of the DBTD-N<sub>2</sub>H<sub>4</sub> on the green channel. (d) Merged image of a, b and c. (e) Fluorescence intensity profiles in linear regions of HeLa cells (blue for Lyso-Blue tracker; Green for DBTD-N<sub>2</sub>H<sub>4</sub>). (f) Colocalization scatterplots of (e). PC: 0.75. Blue channel:  $\lambda_{\text{exc}} = 405 \text{ nm}$ ,  $\lambda_{\text{em}} = 425 - 475 \text{ nm}$ ; Green channel:  $\lambda_{\text{exc}} = 488 \text{ nm}$ ,  $\lambda_{\text{em}} = 500 - 550 \text{ nm}$ ; Scale bar = 20 µm.

### References

1. S. T. Ruan, Y. Gao, Y. Y. Wang, M. X. Li, H. Y. Yang, J. Song, Z. L. Wang and S. F. Wang, *New J. Chem.*, 2020, **44**, 15752.
2. J. L. Han, X. X. Yue, J. P. Wang, Y. Zhang, B. H. Wang and X. Z. Song, *Chinese Chem Lett.*, 2020, **31**, 1508-1510.
3. Z. X. Li, W. Y. Zhang, C. X. Liu, M. M. Yu, H. Y. Zhang, L. Guo and L. H. Wei, *Sens. Actuators, B.*, 2017, **241**, 665-671.
4. S. Sinha, P. G. Sagarika Dev, S. Mukhopadhyay, T. Mukherjee and S. Ghosh, *Sens. Actuators, B.*, 2015, **221**, 418-426.

5. T. Tang, Y. Q. Chen, B. S. Fu, Z. Y. He, H. Xiao, F. Wu, J. Q. Wang, S. R. Wang and X. Zhou, *Chinese Chem Lett.*, 2016, **27**, 540-544.

6. C. T. Liu, F. Wang, T. Xiao, B. Chi, Y. H. Wu, D. R. Zhu and X. Q. Chen, *Sens. Actuators, B.*, 2018, **256**, 55-62.
